# Supplementary material for: Nut Consumption and Cardiovascular Risk Factors: A Cross-Sectional Study in a Mediterranean Population
Source: PubMed Central journal article supplement (PMC5748747; doi:10.3390/nu9121296), 2017-11-28
Supplement: nutrients-09-01296-s001.pdf [file nutrients-09-01296-s001.pdf]

**Table S1.** Characteristics associated with frequency of nut consumption (full-entire sample;  $N_n=4,416$ ).

|                                                                                                           | Daily nut consumption<br>$N_n=212$ | Weekly nut consumption<br>$N_n=487$ | Monthly nut consumption<br>$N_n=1,276$ | Infrequent or never nut consumption<br>$N_n=2,441$ | Overall $p^P$<br>(post-hoc test $p-V^P$ -values)                                                                                                 |
|-----------------------------------------------------------------------------------------------------------|------------------------------------|-------------------------------------|----------------------------------------|----------------------------------------------------|--------------------------------------------------------------------------------------------------------------------------------------------------|
| <b>Sex; n (%)</b>                                                                                         |                                    |                                     |                                        |                                                    |                                                                                                                                                  |
| men                                                                                                       | 52 (24.5)                          | 144 (29.6)                          | 490 (38.6)                             | 1017 (41.7)                                        | <0.001 (0.173 <sup>DW</sup> , <0.001 <sup>DM</sup> , <0.001 <sup>DI</sup> )                                                                      |
| women                                                                                                     | 160 (75.5)                         | 343 (70.4)                          | 786 (61.6)                             | 1424 (58.3)                                        | 0.001 <sup>WM</sup> , <0.001 <sup>WN</sup> , 0.054 <sup>MN</sup> )                                                                               |
| <b>Age (years); median (interquartile range (IQR))</b>                                                    | 58.0 (19.75)                       | 53.0 (21.0)                         | 51.0 (22.0)                            | 56.0 (23.0)                                        | <0.001 (<0.001 <sup>DW</sup> , <0.001 <sup>DM</sup> , 0.060 <sup>DI</sup> )                                                                      |
| <b>Education (years of schooling); median (IQR)</b>                                                       | 12.0 (4.0)                         | 12.0 (3.0)                          | 12.0 (3.0)                             | 12.0 (4.0)                                         | <0.001 (0.438 <sup>DW</sup> , 0.173 <sup>DM</sup> , <0.001 <sup>DN</sup> )                                                                       |
| <b>Material status; median (IQR)</b>                                                                      | 11.0 (4.0)                         | 11.0 (4.0)                          | 11.0 (4.0)                             | 10.0 (4.0)                                         | 0.001 <sup>WM</sup> , <0.001 <sup>WN</sup> , <0.001 <sup>MN</sup> )                                                                              |
| <b>Smoking; n (%)</b>                                                                                     |                                    |                                     |                                        |                                                    |                                                                                                                                                  |
| current smokers                                                                                           | 41 (19.3)                          | 115 (23.6)                          | 361 (28.3)                             | 690 (28.3)                                         | <0.001 (0.073 <sup>DW</sup> , 0.786 <sup>DM</sup> , <0.001 <sup>DN</sup> )                                                                       |
| ex-smokers                                                                                                | 55 (25.9)                          | 114 (23.4)                          | 315 (24.7)                             | 636 (26.1)                                         | <0.001 <sup>DN</sup> , 0.001 <sup>WM</sup> , <0.001 <sup>WN</sup> , <0.001 <sup>MN</sup> )                                                       |
| never-smokers                                                                                             | 116 (54.7)                         | 258 (53.0)                          | 600 (47.0)                             | 1115 (45.7)                                        | 0.008 (0.431 <sup>DW</sup> , 0.021 <sup>DM</sup> , 0.011 <sup>DN</sup> , 0.059 <sup>WM</sup> , 0.012 <sup>WN</sup> , 0.625 <sup>MN</sup> )       |
| <b>Alcohol intake; n (%)</b>                                                                              |                                    |                                     |                                        |                                                    |                                                                                                                                                  |
| excessive                                                                                                 | 32 (15.1)                          | 70 (14.4)                           | 225 (17.6)                             | 437 (17.9)                                         | 0.001 (0.098 <sup>DW</sup> , 0.025 <sup>DM</sup> , 0.403 <sup>DN</sup> , 0.256 <sup>WM</sup> , 0.012 <sup>WN</sup> , 0.002 <sup>MN</sup> )       |
| moderate                                                                                                  | 90 (42.5)                          | 248 (50.9)                          | 631 (49.5)                             | 1069 (43.8)                                        |                                                                                                                                                  |
| none                                                                                                      | 90 (42.5)                          | 169 (34.7)                          | 420 (32.9)                             | 935 (38.3)                                         |                                                                                                                                                  |
| <b>MDSS<math>\geq</math>14 points; n (%)</b>                                                              | 147 (69.3)                         | 189 (38.8)                          | 301 (23.6)                             | 637 (26.1)                                         | <0.001 (<0.001 <sup>DW</sup> , <0.001 <sup>DM</sup> , <0.001 <sup>DN</sup> , <0.001 <sup>WM</sup> , <0.001 <sup>WN</sup> , 0.095 <sup>MN</sup> ) |
| <b>Physical activity; n (%)</b>                                                                           |                                    |                                     |                                        |                                                    |                                                                                                                                                  |
| light                                                                                                     | 51 (24.1)                          | 122 (25.1)                          | 304 (23.8)                             | 612 (25.1)                                         | <0.001 (0.588 <sup>DW</sup> , 0.414 <sup>DM</sup> , 0.041 <sup>DN</sup> , 0.006 <sup>WM</sup> , <0.001 <sup>WN</sup> , 0.019 <sup>MN</sup> )     |
| moderate                                                                                                  | 147 (69.3)                         | 342 (70.2)                          | 852 (66.8)                             | 1532 (62.8)                                        |                                                                                                                                                  |
| intensive                                                                                                 | 14 (6.6)                           | 23 (4.7)                            | 120 (9.4)                              | 295 (12.1)                                         |                                                                                                                                                  |
| <b>BMI (kg/m<sup>2</sup>); n (%)</b>                                                                      |                                    |                                     |                                        |                                                    |                                                                                                                                                  |
| $\leq$ 25.0 (normal)                                                                                      | 102 (48.1)                         | 242 (49.7)                          | 605 (47.4)                             | 984 (40.3)                                         | <0.001 (0.550 <sup>DW</sup> , 0.405 <sup>DM</sup> , 0.017 <sup>DN</sup> , 0.662 <sup>WM</sup> , <0.001 <sup>WN</sup> , <0.001 <sup>MN</sup> )    |
| 25.0-29.9 (overweight)                                                                                    | 83 (39.2)                          | 172 (35.3)                          | 464 (36.4)                             | 971 (39.8)                                         |                                                                                                                                                  |
| $\geq$ 30.0 (obese)                                                                                       | 27 (12.7)                          | 73 (15.0)                           | 207 (16.2)                             | 486 (19.9)                                         |                                                                                                                                                  |
| <b>Waist circumference (<math>\geq</math>94 cm<sup>σ</sup>, <math>\geq</math>80cm<sup>σ</sup>); n (%)</b> | 169 (80.1)                         | 360 (74.2)                          | 919 (72.5)                             | 1909 (78.9)                                        | <0.001 (0.096 <sup>DW</sup> , 0.021 <sup>DM</sup> , 0.695 <sup>DN</sup> , 0.475 <sup>WM</sup> , 0.022 <sup>WN</sup> , <0.001 <sup>MN</sup> )     |
| <b>WHR (<math>\geq</math>0.90 <sup>σ</sup>, <math>\geq</math>0.85<sup>σ</sup>); n (%)</b>                 | 137 (64.9)                         | 296 (61.0)                          | 805 (63.6)                             | 1800 (74.6)                                        | <0.001 (0.330 <sup>DW</sup> , 0.718 <sup>DM</sup> , 0.002 <sup>DN</sup> , 0.313 <sup>WM</sup> , <0.001 <sup>WN</sup> , <0.001 <sup>MN</sup> )    |

|                                                                                                                          |            |            |            |             |                                                                                                                                               |
|--------------------------------------------------------------------------------------------------------------------------|------------|------------|------------|-------------|-----------------------------------------------------------------------------------------------------------------------------------------------|
| <b>WHtR</b> ( $\geq 0.5$ ); n (%)                                                                                        | 159 (75.4) | 348 (71.8) | 932 (73.6) | 1975 (81.7) | <0.001 (0.326 <sup>DW</sup> , 0.583 <sup>DM</sup> , 0.024 <sup>DN</sup> , 0.446 <sup>WM</sup> , <0.001 <sup>WN</sup> , <0.001 <sup>MN</sup> ) |
| <b>Cholesterol</b> ( $\geq 5$ mmol/L); n (%)                                                                             | 164 (77.4) | 378 (77.6) | 892 (69.9) | 1841 (75.4) | <0.001 (0.940 <sup>DW</sup> , 0.027 <sup>DM</sup> , 0.529 <sup>DN</sup> , 0.001 <sup>WM</sup> , 0.301 <sup>WN</sup> , <0.001 <sup>MN</sup> )  |
| <b>HDL</b> ( $\leq 1.03$ mmol/L <sup>♂</sup> , $\leq 1.29$ mmol/L <sup>♀</sup> ); n (%)                                  | 35 (16.5)  | 95 (19.5)  | 231 (18.1) | 493 (20.2)  | 0.321 (0.349 <sup>DW</sup> , 0.575 <sup>DM</sup> , 0.197 <sup>DN</sup> , 0.497 <sup>WM</sup> , 0.729 <sup>WN</sup> , 0.126 <sup>MN</sup> )    |
| <b>LDL</b> ( $\geq 3$ mmol/L); n (%)                                                                                     | 158 (74.5) | 377 (77.4) | 884 (69.3) | 1795 (73.5) | 0.003 (0.408 <sup>DW</sup> , 0.122 <sup>DM</sup> , 0.753 <sup>DN</sup> , 0.001 <sup>WM</sup> , 0.074 <sup>WN</sup> , 0.006 <sup>MN</sup> )    |
| <b>Triglycerides</b> ( $\geq 1.7$ mmol/L); n (%)                                                                         | 41 (19.3)  | 106 (21.8) | 302 (23.7) | 714 (29.3)  | <0.001 (0.469 <sup>DW</sup> , 0.166 <sup>DM</sup> , 0.002 <sup>DN</sup> , 0.397 <sup>WM</sup> , 0.001 <sup>WN</sup> , <0.001 <sup>MN</sup> )  |
| <b>CHD</b> ; n (%)                                                                                                       | 13 (6.1)   | 25 (5.1)   | 59 (4.6)   | 244 (10.0)  | <0.001 (0.592 <sup>DW</sup> , 0.346 <sup>DM</sup> , 0.068 <sup>DN</sup> , 0.658 <sup>WM</sup> , 0.001 <sup>WN</sup> , <0.001 <sup>MN</sup> )  |
| <b>CVI</b> ; n (%)                                                                                                       | 4 (1.9)    | 8 (1.6)    | 17 (1.3)   | 66 (2.7)    | 0.041 (0.819 <sup>DW</sup> , 0.526 <sup>DM</sup> , 0.477 <sup>DN</sup> , 0.662 <sup>WM</sup> , 0.173 <sup>WN</sup> , 0.007 <sup>MN</sup> )    |
| <b>Hypertension</b> (Systolic $\geq 140$ mmHg or Diastolic $\geq 90$ mmHg or treated for hypertension); n (%)            | 73 (34.4)  | 141 (29.0) | 391 (30.7) | 896 (36.8)  | <0.001 (0.148 <sup>DW</sup> , 0.279 <sup>DM</sup> , 0.496 <sup>DN</sup> , 0.471 <sup>WM</sup> , 0.001 <sup>WN</sup> , <0.001 <sup>MN</sup> )  |
| <b>Diabetes</b> ( $\geq 7$ mmol/L or treated for diabetes type 2); n (%)                                                 | 20 (9.4)   | 39 (8.0)   | 105 (8.2)  | 318 (13.0)  | <0.001 (0.533 <sup>DW</sup> , 0.558 <sup>DM</sup> , 0.132 <sup>DN</sup> , 0.880 <sup>WM</sup> , 0.002 <sup>WN</sup> , <0.001 <sup>MN</sup> )  |
| <b>HbA1c</b> ( $\geq 6.5$ mmol/L or treated for diabetes); n (%)                                                         | 19 (9.0)   | 35 (7.2)   | 85 (6.7)   | 255 (10.4)  | 0.001 (0.419 <sup>DW</sup> , 0.224 <sup>DM</sup> , 0.496 <sup>DN</sup> , 0.695 <sup>WM</sup> , 0.028 <sup>WN</sup> , <0.001 <sup>MN</sup> )   |
| <b>Metabolic syndrome</b> ; n (%)                                                                                        | 87 (42.6)  | 189 (39.5) | 471 (39.0) | 1258 (52.3) | <0.001 (0.449 <sup>DW</sup> , 0.327 <sup>DM</sup> , 0.008 <sup>DN</sup> , 0.845 <sup>WM</sup> , <0.001 <sup>WN</sup> , <0.001 <sup>MN</sup> ) |
| <b>Gout</b> (Uric acid $\geq 404$ $\mu\text{mol/L}^{\text{♂}}$ , $\geq 338$ $\mu\text{mol/L}^{\text{♀}}$ or gout); n (%) | 34 (16.9)  | 71 (15.0)  | 191 (16.0) | 513 (21.6)  | <0.001 (0.526 <sup>DW</sup> , 0.747 <sup>DM</sup> , 0.122 <sup>DN</sup> , 0.602 <sup>WM</sup> , 0.001 <sup>WN</sup> , <0.001 <sup>MN</sup> )  |

MDSS - Mediterranean Diet Serving Score. BMI - body mass index. WHR – waist-to-hip ratio. WHtR – waist-to-height ratio. CHD - coronary heart disease. CVI - cerebrovascular insult. ♂: males. ♀: woman. p-Values for categorical variables were obtained with chi-squared test, and for numerical with Kruskal-Wallis test. Post-hoc test ~~p-p-Values~~ values for categorical variables were obtained with chi-squared test, and for numerical with Mann-Whitney U test. <sup>DW</sup> Post-hoc test ~~p-p-V~~ value: ~~Daily-daily~~ vs. ~~Weekly-weekly~~.

<sup>DM</sup> Post-hoc test ~~p-Value~~ P value: ~~Daily-daily~~ vs. ~~Monthly-monthly~~.

<sup>DN</sup> Post-hoc test ~~p-Value~~ P value: ~~Daily-daily~~ vs. ~~Never-never~~.

<sup>WM</sup> Post-hoc test ~~p-Value~~ P value: ~~Weekly-weekly~~ vs. ~~Monthly-monthly~~.

<sup>WN</sup> Post-hoc test ~~p-Value~~ P value: ~~Weekly-weekly~~ vs. ~~Infrequently-infrequently~~ or never.

<sup>MN</sup> Post-hoc test ~~p-Value~~ P value: ~~Monthly-monthly~~ vs. ~~Infrequently-infrequently~~ or never.

Formatted: Font: 9 pt, Not Italic, Superscript

Formatted: MDPI\_3.1\_text

**Table S2.** Characteristics associated with unfavorable biochemical parameters; lipid levels as determined by the multivariate logistic regression models and elevated fibrinogen as determined by ordinal regression model (sample size is 897 participants/subjects without previous cardiovascular disease/CVD diagnosis and older than 65 years of age; all independent variables included in the model are listed in the table).

|                                                              | <b>Cholesterol (≥5 mmol/L)</b><br>Adjusted odds ratio (95% confidence interval); <i>p</i> -Value | <b>LDL (≥3 mmol/L)</b><br>Adjusted odds ratio (95% confidence interval); <i>p</i> -Value | <b>HDL (≤1.03 mmol/L<sup>♂</sup>, ≤1.29 mmol/L<sup>♀</sup>)</b><br>Adjusted odds ratio (95% confidence interval); <i>p</i> -Value | <b>Triglycerides (≥1.7 mmol/L)</b><br>Adjusted odds ratio (95% confidence interval); <i>p</i> -Value | <b>Fibrinogen (≥4.0 g/l is referent)</b><br>Adjusted odds ratio (95% confidence interval); <i>p</i> -Value |
|--------------------------------------------------------------|--------------------------------------------------------------------------------------------------|------------------------------------------------------------------------------------------|-----------------------------------------------------------------------------------------------------------------------------------|------------------------------------------------------------------------------------------------------|------------------------------------------------------------------------------------------------------------|
| <b>Sex</b> (referent (♂): female)                            |                                                                                                  |                                                                                          |                                                                                                                                   |                                                                                                      |                                                                                                            |
| male                                                         | 0.67 (0.43-1.01); 0.120                                                                          | 0.81 (0.52-1.27); 0.360                                                                  | 0.35 (0.21-0.59); <0.001                                                                                                          | 1.04 (0.71-1.53); 0.845                                                                              | 0.96 (0.67-1.37); 0.806                                                                                    |
| <b>Age (years)</b> <u>median (interquartile range (IQR))</u> | 0.96 (0.92-1.00); 0.047                                                                          | 0.98 (0.95-1.02); 0.324                                                                  | 1.00 (0.96-1.05); 0.837                                                                                                           | 0.97 (0.94-1.00); 0.086                                                                              | 1.01 (0.98-1.05); 0.384                                                                                    |
| <b>Place of residence</b> (ref: Split)                       |                                                                                                  |                                                                                          |                                                                                                                                   |                                                                                                      |                                                                                                            |
| Island of Vis                                                | 2.07 (1.05-4.10); 0.035                                                                          | 1.34 (0.70-2.55); 0.379                                                                  | 0.09 (0.04-0.18); <0.001                                                                                                          | 0.56 (0.34-0.93); 0.024                                                                              | 0.41 (0.26-0.67); <0.001                                                                                   |
| Island of Korčula                                            | 1.20 (0.67-2.14); 0.538                                                                          | 1.01 (0.58-1.78); 0.962                                                                  | 0.35 (0.21-0.58); <0.001                                                                                                          | 0.44 (0.28-0.70); <0.001                                                                             | 0.23 (0.15-0.35); <0.001                                                                                   |
| <b>Education</b> (years of schooling, ref: ≥13)              | Overall <i>p</i> = 0.154                                                                         | Overall <i>p</i> = 0.043                                                                 | Overall <i>p</i> = 0.294                                                                                                          | Overall <i>p</i> = 0.328                                                                             | -                                                                                                          |
| 0-8                                                          | 0.58 (0.31-1.10); 0.101                                                                          | 0.59 (0.32-1.08); 0.086                                                                  | 1.27 (0.66-2.46); 0.471                                                                                                           | 1.46 (0.88-2.42); 0.147                                                                              | 2.12 (1.30-3.44); 0.002                                                                                    |
| 9-12                                                         | 0.88 (0.48-1.64); 0.692                                                                          | 1.05 (0.59-1.89); 0.864                                                                  | 1.60 (0.86-2.96); 0.135                                                                                                           | 1.21 (0.74-1.98); 0.448                                                                              | 1.49 (0.94-2.36); 0.092                                                                                    |
| <b>Material status</b> (ref: 4th quartile)                   | Overall <i>p</i> = 0.624                                                                         | Overall <i>p</i> = 0.055                                                                 | Overall <i>p</i> = 0.107                                                                                                          | Overall <i>p</i> = 0.329                                                                             | -                                                                                                          |
| 1st quartile                                                 | 1.47 (0.77-2.80); 0.243                                                                          | 1.54 (0.84-2.81); 0.159                                                                  | 1.01 (0.51-2.00); 0.976                                                                                                           | 1.31 (0.77-2.23); 0.326                                                                              | 0.76 (0.46-1.24); 0.267                                                                                    |
| 2nd quartile                                                 | 1.32 (0.69-2.53); 0.402                                                                          | 1.35 (0.74-2.47); 0.334                                                                  | 1.12 (0.56-2.21); 0.750                                                                                                           | 1.10 (0.64-1.91); 0.726                                                                              | 0.88 (0.54-1.45); 0.618                                                                                    |
| 3rd quartile                                                 | 1.12 (0.57-2.18); 0.749                                                                          | 1.24 (0.65-2.34); 0.512                                                                  | 1.88 (0.94-3.78); 0.075                                                                                                           | 1.58 (0.90-2.77); 0.114                                                                              | 0.95 (0.56-1.61); 0.847                                                                                    |
| <b>Smoking</b> (ref: never-smokers)                          | Overall <i>p</i> = 0.803                                                                         | Overall <i>p</i> = 0.408                                                                 | Overall <i>p</i> = 0.806                                                                                                          | Overall <i>p</i> = 0.226                                                                             | -                                                                                                          |
| current smokers                                              | 0.94 (0.47-1.87); 0.860                                                                          | 1.44 (0.72-2.90); 0.303                                                                  | 0.87 (0.43-1.78); 0.712                                                                                                           | 1.56 (0.94-2.57); 0.085                                                                              | 1.27 (0.78-2.05); 0.340                                                                                    |
| ex-smokers                                                   | 0.85 (0.52-1.38); 0.507                                                                          | 0.87 (0.55-1.36); 0.535                                                                  | 0.85 (0.50-1.45); 0.548                                                                                                           | 1.11 (0.75-1.63); 0.609                                                                              | 0.86 (0.59-1.24); 0.418                                                                                    |
| <b>Alcohol intake</b> (ref: none)                            | Overall <i>p</i> = 0.196                                                                         | Overall <i>p</i> = 0.504                                                                 | Overall <i>p</i> = 0.182                                                                                                          | Overall <i>p</i> = 0.320                                                                             | -                                                                                                          |
| excessive                                                    | 1.74 (0.87-3.48); 0.114                                                                          | 1.23 (0.65-2.35); 0.528                                                                  | 0.62 (0.30-1.26); 0.183                                                                                                           | 1.13 (0.67-1.91); 0.643                                                                              | 0.69 (0.41-1.15); 0.153                                                                                    |
| moderate                                                     | 1.01 (0.64-1.61); 0.960                                                                          | 0.89 (0.57-1.38); 0.609                                                                  | 0.68 (0.44-1.06); 0.088                                                                                                           | 0.83 (0.57-1.20); 0.323                                                                              | 0.92 (0.65-1.29); 0.620                                                                                    |
| <b>MDSS compliance</b> (ref: yes)                            |                                                                                                  |                                                                                          |                                                                                                                                   |                                                                                                      |                                                                                                            |
| no                                                           | 0.86 (0.56-1.31); 0.478                                                                          | 0.83 (0.55-1.23); 0.345                                                                  | 1.30 (0.85-2.00); 0.229                                                                                                           | 0.81 (0.58-1.12); 0.204                                                                              | 0.83 (0.61-1.13); 0.231                                                                                    |
| <b>Nut consumption</b> (ref: infrequently or never)          | Overall <i>p</i> = 0.350                                                                         | Overall <i>p</i> = 0.470                                                                 | Overall <i>p</i> = 0.142                                                                                                          | Overall <i>p</i> = 0.303                                                                             | -                                                                                                          |
| daily                                                        | 1.71 (0.68-4.27); 0.253                                                                          | 1.02 (0.48-2.20); 0.950                                                                  | 1.37 (0.64-2.89); 0.416                                                                                                           | 0.69 (0.34-1.40); 0.308                                                                              | 0.65 (0.35-1.22); 0.183                                                                                    |
| weekly                                                       | 1.79 (0.84-3.65); 0.136                                                                          | 1.76 (0.87-3.55); 0.115                                                                  | 0.65 (0.33-1.29); 0.222                                                                                                           | 0.62 (0.35-1.11); 0.107                                                                              | 0.80 (0.48-1.32); 0.379                                                                                    |
| monthly                                                      | 1.21 (0.74-1.97); 0.445                                                                          | 1.11 (0.70-1.76); 0.660                                                                  | 0.64 (0.38-1.06); 0.083                                                                                                           | 1.03 (0.70-1.52); 0.878                                                                              | 0.58 (0.39-0.84); 0.004                                                                                    |
| <b>Physical activity</b> (ref: intensive)                    | Overall <i>p</i> = 0.689                                                                         | Overall <i>p</i> = 0.610                                                                 | Overall <i>p</i> = 0.517                                                                                                          | Overall <i>p</i> = 0.207                                                                             | -                                                                                                          |

Formatted: Font: Italic

Formatted: Left

Formatted: Font: Italic

Formatted: Not Superscript/ Subscript

Formatted: Not Superscript/ Subscript

Formatted: Not Superscript/ Subscript

Formatted: Not Superscript/ Subscript

|                                                                                                                   |                         |                         |                         |                            |                         |
|-------------------------------------------------------------------------------------------------------------------|-------------------------|-------------------------|-------------------------|----------------------------|-------------------------|
| light                                                                                                             | 1.00 (0.47-2.13); 0.996 | 0.70 (0.34-1.43); 0.326 | 0.98 (0.46-2.10); 0.958 | 1.52 (0.84-2.73); 0.166    | 1.10 (0.64-1.88); 0.725 |
| moderate                                                                                                          | 0.83 (0.42-1.64); 0.596 | 0.79 (0.41-1.53); 0.486 | 0.77 (0.38-1.56); 0.474 | 1.12 (0.66-1.91); 0.672    | 0.64 (0.40-1.04); 0.074 |
| <b>WHR</b> ( $\geq 0.5$ , ref: yes)                                                                               |                         |                         |                         |                            |                         |
| no                                                                                                                | 0.47 (0.21-1.05); 0.066 | 0.32 (0.15-0.66); 0.002 | 0.33 (0.09-1.15); 0.081 | 0.37 (0.14-0.99); 0.049    | 0.96 (0.49-1.90); 0.913 |
| <b>Hypertension</b> (systolic $\geq 140$ mmHg or diastolic $\geq 90$ mmHg or treated for hypertension, ref: yes)  |                         |                         |                         |                            |                         |
| no                                                                                                                | 0.76 (0.51-1.14); 0.184 | 0.83 (0.57-1.22); 0.348 | 0.93 (0.61-1.41); 0.717 | 0.72 (0.52-1.00); 0.051    | 1.31 (0.97-1.77); 0.082 |
| <b>Diabetes</b> ( $\geq 7$ mmol/L or treated for diabetes type 2, ref: yes)                                       |                         |                         |                         |                            |                         |
| no                                                                                                                | 1.89 (1.20-2.97); 0.006 | 1.63 (1.05-2.54); 0.030 | 0.56 (0.35-0.90); 0.017 | 0.87 (0.59-1.29); 0.493    | 1.01 (0.69-1.48); 0.951 |
| <b>Gout</b> (uric acid $\geq 404$ $\mu\text{mol/L}^\circ$ , $\geq 338$ $\mu\text{mol/L}^\circ$ or gout, ref: yes) |                         |                         |                         |                            |                         |
| no                                                                                                                | 1.47 (0.97-2.24); 0.073 | 1.22 (0.82-1.84); 0.328 | 0.64 (0.41-0.99); 0.045 | 0.43 (0.31-0.60); $<0.001$ | 0.90 (0.65-1.26); 0.541 |

MDSS - Mediterranean Diet Serving Score. WHtR - waist-to-height ratio.  $\sigma$ : males.  $\rho$ : woman. Multivariate logistic regression models were built separately for cholesterol, LDL, HDL and triglycerides. Multivariate ordinal regression model was used for the analysis of the characteristics associated with elevated fibrinogen. Adjusted odds ratios, 95% confidence intervals and  $p$ -Values were calculated using multivariate regression models; each of the five models presented here was simultaneously adjusted for all the covariates listed in this table.

**Table S3.** Characteristics associated with hypertension, diabetes, metabolic syndrome and gout as determined by the multivariate logistic regression analyses (sample size is 897 participants/subjects without previous cardiovascular disease/CVD-diagnosis and older than 65 years of age; all independent variables included in the model are listed in the table).

|                                                        | <b>Hypertension (systolic <math>\geq 140</math> mmHg or diastolic <math>\geq 90</math> mmHg or treated for hypertension)</b><br>Adjusted odds ratio (95% confidence interval); $p$ -Value <sup>¶</sup> | <b>Diabetes (<math>\geq 7</math> mmol/L or treated for diabetes type 2)</b><br>Adjusted odds ratio (95% confidence interval); $p$ -Value <sup>¶</sup> | <b>Elevated HbA1c (<math>\geq 6.5</math> mmol/L or treated for diabetes type 2)</b><br>Adjusted odds ratio (95% confidence interval); $p$ -Value <sup>¶</sup> | <b>Metabolic syndrome</b><br>Adjusted odds ratio (95% confidence interval); $p$ -Value <sup>¶</sup> | <b>Gout (uric acid <math>\geq 404</math> mmol/L<sup>°</sup> or gout)</b><br>Adjusted odds ratio (95% confidence interval); $p$ -Value <sup>¶</sup> |
|--------------------------------------------------------|--------------------------------------------------------------------------------------------------------------------------------------------------------------------------------------------------------|-------------------------------------------------------------------------------------------------------------------------------------------------------|---------------------------------------------------------------------------------------------------------------------------------------------------------------|-----------------------------------------------------------------------------------------------------|----------------------------------------------------------------------------------------------------------------------------------------------------|
| <b>Sex</b> (referent (fref): female)                   |                                                                                                                                                                                                        |                                                                                                                                                       |                                                                                                                                                               |                                                                                                     |                                                                                                                                                    |
| male                                                   | 1.29 (0.90-1.86); 0.171                                                                                                                                                                                | 1.99 (1.24-3.19); 0.005                                                                                                                               | 1.33 (0.80-2.19); 0.268                                                                                                                                       | 0.36 (0.24-0.53); $<0.001$                                                                          | 1.12 (0.75-1.67); 0.575                                                                                                                            |
| <b>Age (years)</b>                                     |                                                                                                                                                                                                        |                                                                                                                                                       |                                                                                                                                                               |                                                                                                     |                                                                                                                                                    |
|                                                        | 0.99 (0.97-1.03); 0.779                                                                                                                                                                                | 1.02 (0.98-1.06); 0.268                                                                                                                               | 1.04 (1.00-1.08); 0.038                                                                                                                                       | 0.97 (0.94-1.00); 0.069                                                                             | 1.05 (1.01-1.08); 0.006                                                                                                                            |
| <b>Place of residence</b> (ref: Split)                 |                                                                                                                                                                                                        |                                                                                                                                                       |                                                                                                                                                               |                                                                                                     |                                                                                                                                                    |
| Island of Vis                                          | 0.59 (0.36-0.95); 0.032                                                                                                                                                                                | 0.98 (0.50-1.92); 0.949                                                                                                                               | 0.97 (0.46-2.07); 0.940                                                                                                                                       | 2.37 (1.35-4.17); 0.003                                                                             | 1.75 (0.98-3.14); 0.060                                                                                                                            |
| Island of Korčula                                      | 1.07 (0.70-1.63); 0.771                                                                                                                                                                                | 1.38 (0.75-2.55); 0.296                                                                                                                               | 1.91 (0.97-3.77); 0.061                                                                                                                                       | 0.84 (0.53-1.33); 0.454                                                                             | 1.66 (0.98-2.80); 0.061                                                                                                                            |
| <b>Education</b> (years of schooling, ref: $\geq 13$ ) |                                                                                                                                                                                                        |                                                                                                                                                       |                                                                                                                                                               |                                                                                                     |                                                                                                                                                    |
|                                                        | Overall $p = P = 0.007$                                                                                                                                                                                | Overall $p = P = 0.150$                                                                                                                               | Overall $p = P = 0.417$                                                                                                                                       | Overall $p = P = 0.653$                                                                             | Overall $p = P = 0.020$                                                                                                                            |
| 0-8                                                    | 1.62 (1.03-2.57); 0.038                                                                                                                                                                                | 1.93 (0.99-3.73); 0.052                                                                                                                               | 1.60 (0.80-3.22); 0.186                                                                                                                                       | 1.20 (0.73-1.99); 0.466                                                                             | 1.16 (0.69-1.93); 0.579                                                                                                                            |
| 9-12                                                   | 0.93 (0.60-1.44); 0.749                                                                                                                                                                                | 1.67 (0.88-3.20); 0.119                                                                                                                               | 1.41 (0.71-2.80); 0.330                                                                                                                                       | 1.02 (0.63-1.64); 0.948                                                                             | 0.66 (0.40-1.09); 0.106                                                                                                                            |

|                                                                                                                            |                          |                          |                          |                          |                          |
|----------------------------------------------------------------------------------------------------------------------------|--------------------------|--------------------------|--------------------------|--------------------------|--------------------------|
| <b>Material status</b> (ref: 4th quartile)                                                                                 | Overall $p = P=0.497$    | Overall $p = P=0.031$    | Overall $p = P=0.092$    | Overall $p = P=0.444$    | Overall $p = P=0.581$    |
| 1st quartile                                                                                                               | 0.81 (0.50-1.32); 0.405  | 1.79 (0.88-3.64); 0.111  | 1.41 (0.68-2.93); 0.350  | 0.74 (0.43-1.25); 0.260  | 0.70 (0.41-1.17); 0.173  |
| 2nd quartile                                                                                                               | 0.88 (0.54-1.44); 0.618  | 1.71 (0.83-3.53); 0.147  | 1.23 (0.58-2.60); 0.596  | 1.00 (0.58-1.73); 0.992  | 0.74 (0.44-1.26); 0.264  |
| 3rd quartile                                                                                                               | 0.68 (0.41-1.15); 0.148  | 2.84 (1.37-5.87); 0.005  | 2.24 (1.06-4.73); 0.034  | 0.96 (0.54-1.71); 0.891  | 0.81 (0.46-1.41); 0.452  |
| <b>Smoking</b> (ref: never-smokers)                                                                                        | Overall $p = P=0.210$    | Overall $p = P=0.166$    | Overall $p = P=0.347$    | Overall $p = P=0.549$    | Overall $p = P=0.005$    |
| current smokers                                                                                                            | 1.11 (0.69-1.79); 0.660  | 0.61 (0.30-1.24); 0.173  | 0.76 (0.36-1.62); 0.481  | 0.83 (0.48-1.43); 0.502  | 0.69 (0.38-1.24); 0.210  |
| ex-smokers                                                                                                                 | 0.75 (0.52-1.08); 0.121  | 1.26 (0.80-1.99); 0.324  | 1.32 (0.80-2.17); 0.274  | 0.81 (0.54-1.22); 0.315  | 1.69 (1.15-2.51); 0.008  |
| <b>Alcohol intake</b> (ref: none)                                                                                          | Overall $p = P=0.474$    | Overall $p = P=0.473$    | Overall $p = P=0.496$    | Overall $p = P=0.009$    | Overall $p = P=0.220$    |
| excessive                                                                                                                  | 0.73 (0.44-1.21); 0.228  | 0.79 (0.42-1.46); 0.448  | 0.76 (0.39-1.48); 0.422  | 1.59 (0.90-2.82); 0.109  | 1.06 (0.62-1.82); 0.837  |
| moderate                                                                                                                   | 0.92 (0.65-1.30); 0.639  | 0.76 (0.48-1.19); 0.224  | 0.76 (0.47-1.21); 0.248  | 0.76 (0.51-1.14); 0.187  | 1.36 (0.93-1.99); 0.115  |
| <b>MDSS compliance</b> (ref: yes)                                                                                          |                          |                          |                          |                          |                          |
| no                                                                                                                         | 1.34 (0.99-1.83); 0.062  | 0.59 (0.40-0.87); 0.008  | 0.60 (0.40-0.91); 0.015  | 1.14 (0.80-1.62); 0.458  | 1.63 (1.16-2.31); 0.005  |
| <b>Nut consumption</b> (ref: infrequently or never)                                                                        | Overall $p = P=0.496$    | Overall $p = P=0.583$    | Overall $p = P=0.051$    | Overall $p = P=0.659$    | Overall $p = P=0.968$    |
| daily                                                                                                                      | 0.97 (0.53-1.78); 0.921  | 0.61 (0.26-1.43); 0.253  | 0.29 (0.10-0.87); 0.028  | 0.84 (0.43-1.64); 0.607  | 0.89 (0.44-1.82); 0.757  |
| weekly                                                                                                                     | 1.18 (0.72-1.96); 0.509  | 0.88 (0.45-1.72); 0.704  | 0.71 (0.34-1.47); 0.360  | 0.75 (0.43-1.30); 0.306  | 0.99 (0.57-1.72); 0.968  |
| monthly                                                                                                                    | 1.32 (0.91-1.91); 0.148  | 0.79 (0.49-1.28); 0.337  | 0.61 (0.36-1.01); 0.056  | 0.82 (0.55-1.23); 0.345  | 0.91 (0.61-1.37); 0.660  |
| <b>Physical activity</b> (ref: intensive)                                                                                  | Overall $p = P=0.770$    | Overall $p = P=0.291$    | Overall $p = P=0.336$    | Overall $p = P=0.484$    | Overall $p = P=0.112$    |
| light                                                                                                                      | 0.97 (0.56-1.70); 0.927  | 1.69 (0.84-3.39); 0.141  | 1.68 (0.79-3.56); 0.176  | 0.85 (0.45-1.62); 0.632  | 0.95 (0.52-1.73); 0.863  |
| moderate                                                                                                                   | 0.88 (0.53-1.44); 0.605  | 1.31 (0.69-2.46); 0.410  | 1.29 (0.65-2.56); 0.470  | 0.73 (0.41-1.30); 0.291  | 1.38 (0.81-2.36); 0.236  |
| <b>WHtR</b> ( $\geq 0.5$ , ref: yes)                                                                                       |                          |                          |                          |                          |                          |
| no                                                                                                                         | 0.61 (0.31-1.21); 0.158  | 1.26 (0.41-3.89); 0.692  | 0.68 (0.15-3.05); 0.611  | 0.17 (0.08-0.37); <0.001 | 0.75 (0.30-1.92); 0.554  |
| <b>Hypertension</b> (systolic $\geq 140$ mmHg or diastolic $\geq 90$ mmHg or treated for hypertension, ref: yes)           |                          |                          |                          |                          |                          |
| no                                                                                                                         | na                       | 0.67 (0.45-1.01); 0.054  | 0.64 (0.42-0.99); 0.046  | 0.48 (0.34-0.67); <0.001 | 0.50 (0.36-0.71); <0.001 |
| <b>Diabetes</b> ( $\geq 7$ mmol/L or treated for diabetes type 2, ref: yes)                                                |                          |                          |                          |                          |                          |
| no                                                                                                                         | 0.68 (0.46-1.02); 0.064  | na                       | na                       | 0.21 (0.12-0.36); <0.001 | 0.85 (0.57-1.27); 0.436  |
| <b>Metabolic syndrome</b> (ref: yes)                                                                                       |                          |                          |                          |                          |                          |
| no                                                                                                                         | 0.47 (0.33-0.65); <0.001 | 0.20 (0.11-0.36); <0.001 | 0.22 (0.12-0.41); <0.001 | na                       | 0.56 (0.38-0.84); 0.005  |
| <b>Gout</b> (uric acid $\geq 404$ $\mu\text{mol/L}^{\circ}$ $\geq 338$ $\mu\text{mol/L}^{\circ}$ or gout); yes is referent |                          |                          |                          |                          |                          |

Formatted: Not Superscript/ Subscript

Formatted: Not Superscript/ Subscript

Formatted: Not Superscript/ Subscript

Formatted: Not Superscript/ Subscript

Formatted Table

no                      0.50 (0.36-0.70); <0.001                      0.84 (0.56-1.26); 0.399                      0.92 (0.60-1.41); 0.694                      0.54 (0.36-0.81); 0.003                      na

▲ MDSS - Mediterranean Diet Serving Score. WHtR – waist-to-height ratio. na – not applicable. ♂: -males. ♀: woman. ▲

Multivariate logistic regression models were built separately for ▲hypertension, diabetes, metabolic syndrome and gout. ▲Adjusted odds ratios, 95% confidence intervals and  $p$ - $V$  $P$  values were calculated using multivariate logistic regression; each of the four models was simultaneously adjusted for all covariates listed in this table, with an exception of excluding predictor variables in models where those variables were the outcome variables (marked with “na”).

Formatted: Font: 9 pt, Not Italic, Font color: Black

Formatted: Space After: 6 pt, Line spacing: At least 13 pt

Formatted: Font: 9 pt, Not Italic, Font color: Black

Formatted: Font: 9 pt, Font color: Black

Formatted: Font: 9 pt, Not Italic, Font color: Black

Formatted: Font: 9 pt, Not Italic, Font color: Black

Formatted: MDPI\_4.3\_table\_footer
